# Supplementary material for: Influence of molecular width on the thermal expansion in solids
Source: Royal Society of Chemistry journal article supplement (doi:10.1039/c9nj04888j), 2019-01-01
Supplement: c9nj04888j1.pdf [file c9nj04888j1.pdf]

## Supporting information

### Influence of molecular width on the thermal expansion in solids

Sumair A. Rather, Viswanadha G. Saraswatula, Durgam Sharada and Binoy K. Saha\*

#### Contents:

**Figure S1.** Colours and UV-vis spectra of the charge transfer complexes.

**Table S1.** Crystallographic details of 1 and 3 at two different temperatures.

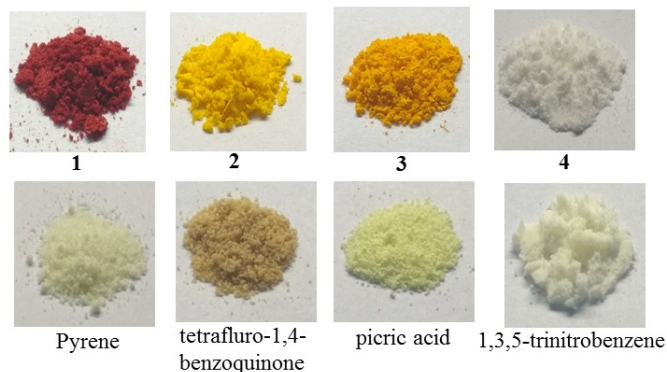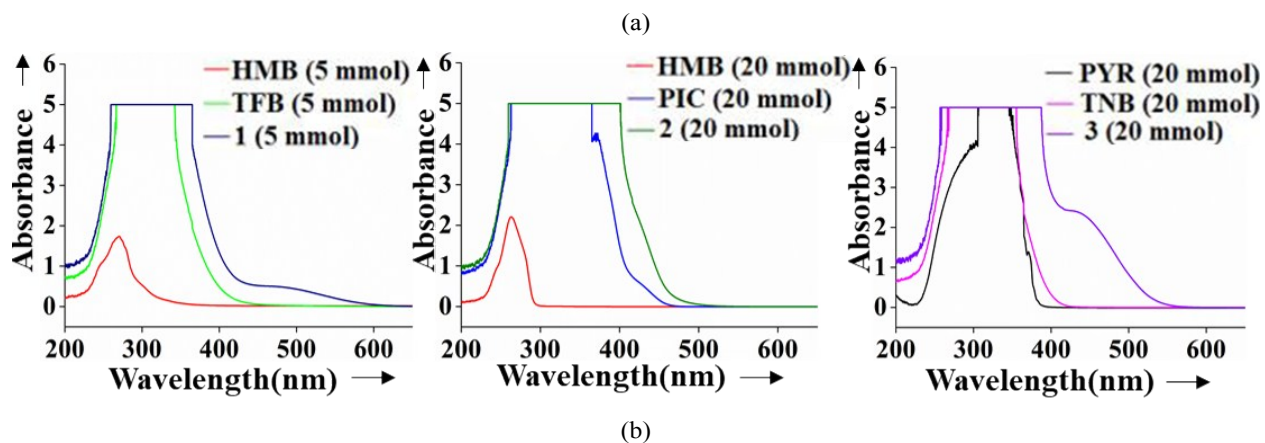

**Fig. S1** (a) Colours and (b) UV-vis spectra of the three charge transfer complexes (1–3) and their individual components (HMB: hexamethylbenzene, PYR: pyrene, TFB: tetrafluoro-1,4-benzoquinone, PIC: picric acid and TNB: 1,3,5-trinitrobenzene).

**Table S1.** Crystallographic details of **1** (1:1 hexamethylbenzene/tetrafluoro-1,4-benzoquinone co-crystal) and **3** (1:1 pyrene/trinitrobenzene co-crystal) at two different temperatures for each.

|                                    |                                                               |                                                               |                                                               |                                                               |
|------------------------------------|---------------------------------------------------------------|---------------------------------------------------------------|---------------------------------------------------------------|---------------------------------------------------------------|
| Identification code                | 1-190k                                                        | 1-298K                                                        | 3-118                                                         | 3-298k                                                        |
| Empirical formula                  | C <sub>18</sub> H <sub>18</sub> F <sub>4</sub> O <sub>2</sub> | C <sub>18</sub> H <sub>18</sub> F <sub>4</sub> O <sub>2</sub> | C <sub>22</sub> H <sub>13</sub> N <sub>3</sub> O <sub>6</sub> | C <sub>22</sub> H <sub>13</sub> N <sub>3</sub> O <sub>6</sub> |
| Formula weight                     | 342.32                                                        | 342.32                                                        | 415.35                                                        | 415.35                                                        |
| Temperature/K                      | 190(2)                                                        | 298(2)                                                        | 118(2)                                                        | 298(2)                                                        |
| Crystal system                     | trigonal                                                      | trigonal                                                      | triclinic                                                     | triclinic                                                     |
| Space group                        | <i>R</i> 3 <i>m</i>                                           | <i>R</i> 3 <i>m</i>                                           | <i>P</i> 1                                                    | <i>P</i> 1                                                    |
| a/Å                                | 14.5418(12)                                                   | 14.6259(12)                                                   | 6.6469(4)                                                     | 6.7752(5)                                                     |
| b/Å                                | 14.5418(12)                                                   | 14.6259(12)                                                   | 8.4809(6)                                                     | 8.5522(9)                                                     |
| c/Å                                | 6.6076(8)                                                     | 6.7359(6)                                                     | 16.2117(12)                                                   | 16.3550(15)                                                   |
| α/°                                | 90                                                            | 90                                                            | 93.121(6)                                                     | 93.041(8)                                                     |
| β/°                                | 90                                                            | 90                                                            | 95.577(6)                                                     | 95.628(7)                                                     |
| γ/°                                | 120                                                           | 120                                                           | 101.583(6)                                                    | 101.281(7)                                                    |
| Volume/Å <sup>3</sup>              | 1210.1(2)                                                     | 1247.9(2)                                                     | 888.46(11)                                                    | 922.34(14)                                                    |
| Z                                  | 3                                                             | 3                                                             | 2                                                             | 2                                                             |
| ρ <sub>calc</sub> /cm <sup>3</sup> | 1.409                                                         | 1.367                                                         | 1.553                                                         | 1.496                                                         |
| μ/mm <sup>-1</sup>                 | 0.121                                                         | 0.118                                                         | 0.116                                                         | 0.112                                                         |
| F(000)                             | 534.0                                                         | 534.0                                                         | 428.0                                                         | 428.0                                                         |
| Crystal size/mm <sup>3</sup>       | 0.8 × 0.25 × 0.18                                             | 0.8 × 0.25 × 0.18                                             | 0.6 × 0.2 × 0.15                                              | 0.6 × 0.2 × 0.15                                              |
| Radiation                          | MoKα (λ = 0.71073)                                            |
| 2θ range for data collection/°     | 8.942 to 57.606                                               | 8.834 to 58.526                                               | 7.32 to 58.3                                                  | 7.58 to 58.4                                                  |
| Index ranges                       | -15 ≤ h ≤ 16, -19 ≤ k ≤ 18, -4 ≤ l ≤ 8                        | -18 ≤ h ≤ 18, -19 ≤ k ≤ 19, -9 ≤ l ≤ 8                        | -9 ≤ h ≤ 8, -11 ≤ k ≤ 10, -21 ≤ l ≤ 22                        | -9 ≤ h ≤ 9, -11 ≤ k ≤ 11, -21 ≤ l ≤ 21                        |
| Reflections collected              | 1388                                                          | 3935                                                          | 9229                                                          | 9322                                                          |
| Independent reflections            | 364 [R <sub>int</sub> = 0.0171, R <sub>sigma</sub> = 0.0161]  | 399 [R <sub>int</sub> = 0.0315, R <sub>sigma</sub> = 0.0132]  | 4009 [R <sub>int</sub> = 0.0277, R <sub>sigma</sub> = 0.0404] | 4259 [R <sub>int</sub> = 0.0318, R <sub>sigma</sub> = 0.0522] |
| Data/restraints/parameters         | 364/0/33                                                      | 399/0/33                                                      | 4009/0/280                                                    | 4259/0/281                                                    |
| Goodness-of-fit on F <sup>2</sup>  | 1.085                                                         | 1.042                                                         | 1.061                                                         | 1.009                                                         |
| Final R indexes [I ≥ 2σ (I)]       | R <sub>1</sub> = 0.0440, wR <sub>2</sub> = 0.1050             | R <sub>1</sub> = 0.0530, wR <sub>2</sub> = 0.1293             | R <sub>1</sub> = 0.0441, wR <sub>2</sub> = 0.1039             | R <sub>1</sub> = 0.0571, wR <sub>2</sub> = 0.1273             |
| Final R indexes [all data]         | R <sub>1</sub> = 0.0622, wR <sub>2</sub> = 0.1166             | R <sub>1</sub> = 0.0834, wR <sub>2</sub> = 0.1561             | R <sub>1</sub> = 0.0614, wR <sub>2</sub> = 0.1159             | R <sub>1</sub> = 0.1238, wR <sub>2</sub> = 0.1656             |
| CCDC no.                           | 1954373                                                       | 1954374                                                       | 1954375                                                       | 1954376                                                       |
